# Supplementary material for: Spatial Agreement of Brainstem Dose Distributions Depending on Biological Model in Proton Therapy for Pediatric Brain Tumors
Source: PubMed Central journal article supplement — Adv Radiat Oncol. 2020 Aug 28;6(1):100551. doi: 10.1016/j.adro.2020.08.008 (PMC7811129; doi:10.1016/j.adro.2020.08.008), 2020-08-28
Supplement: mmc1.pdf [file mmc1.pdf]

## Supplementary Materials

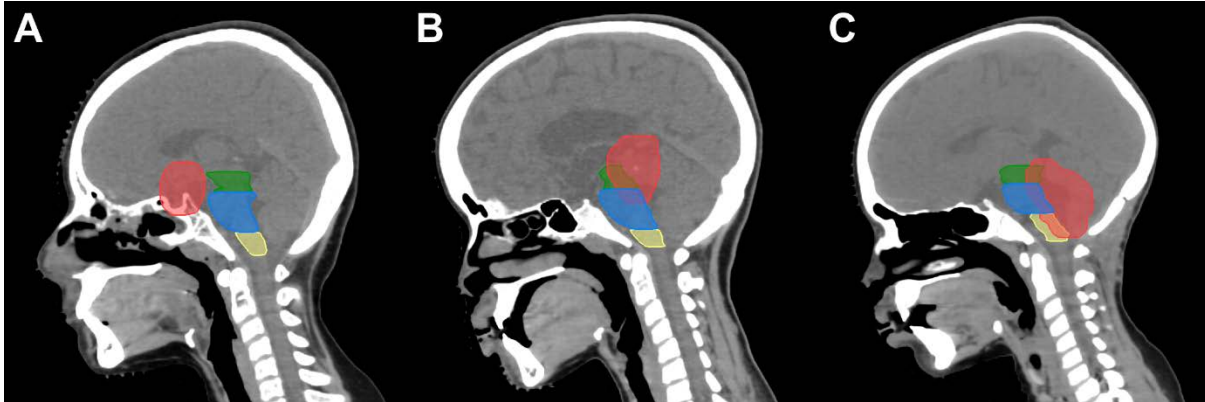

**Figure E1** Three patients diagnosed with craniopharyngioma (A), low-grade glioma (B) and ependymoma (C). Delineated: Midbrain (green), pons (blue), medulla oblongata (yellow) and PTV (red). *Abbreviation:* PTV = planning target volume.

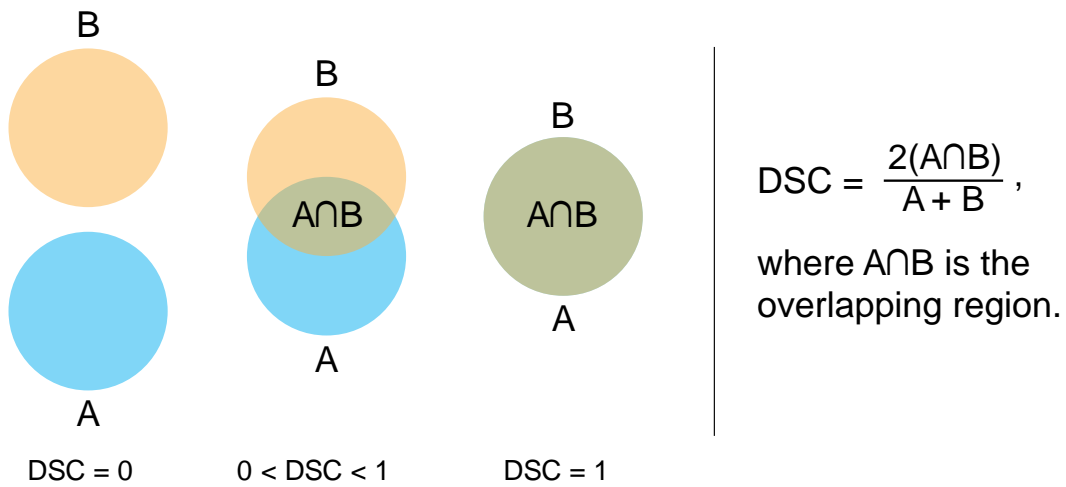

**Figure E2** Illustration of the Dice similarity coefficient (DSC).

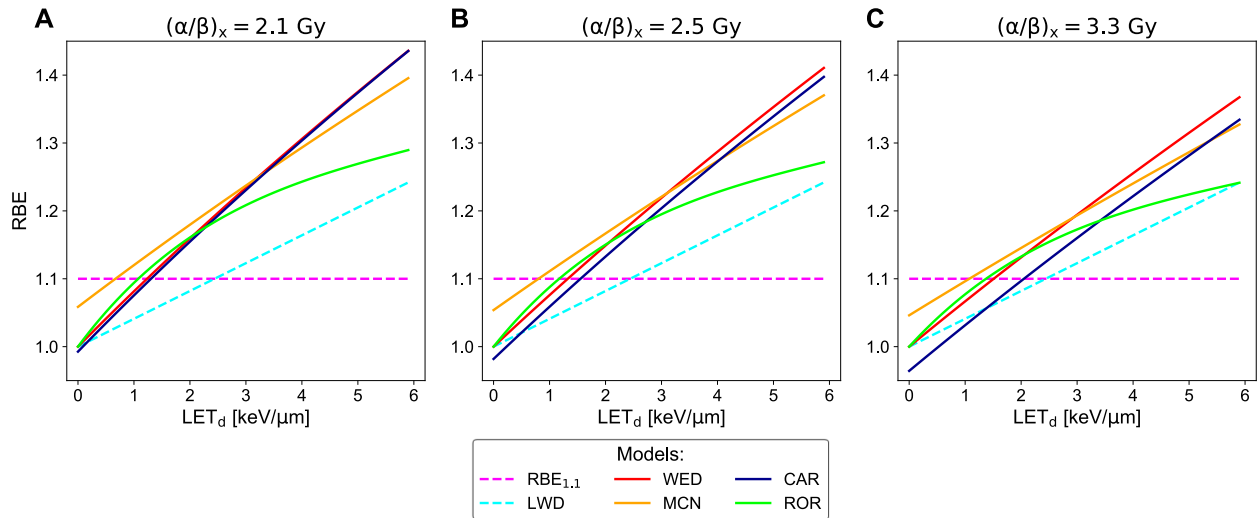

**Figure E3** LET<sub>d</sub> dependencies for the phenomenological models at a physical dose of 1.55 Gy (median physical fraction dose in the midbrain for the glioma patient),  $(\alpha/\beta)_x = 2.1, 2.5$  and  $3.3$  Gy. LWD RBE and RBE<sub>1.1</sub> ( $(\alpha/\beta)_x$  independent) are shown for reference. *Abbreviations:* LET<sub>d</sub> = dose-averaged linear energy transfer; RBE = relative biological effectiveness, WED = Wedenberg; CAR = Carabe; MCN = McNamara; ROR = Rørvik; LWD = LET-weighted dose.

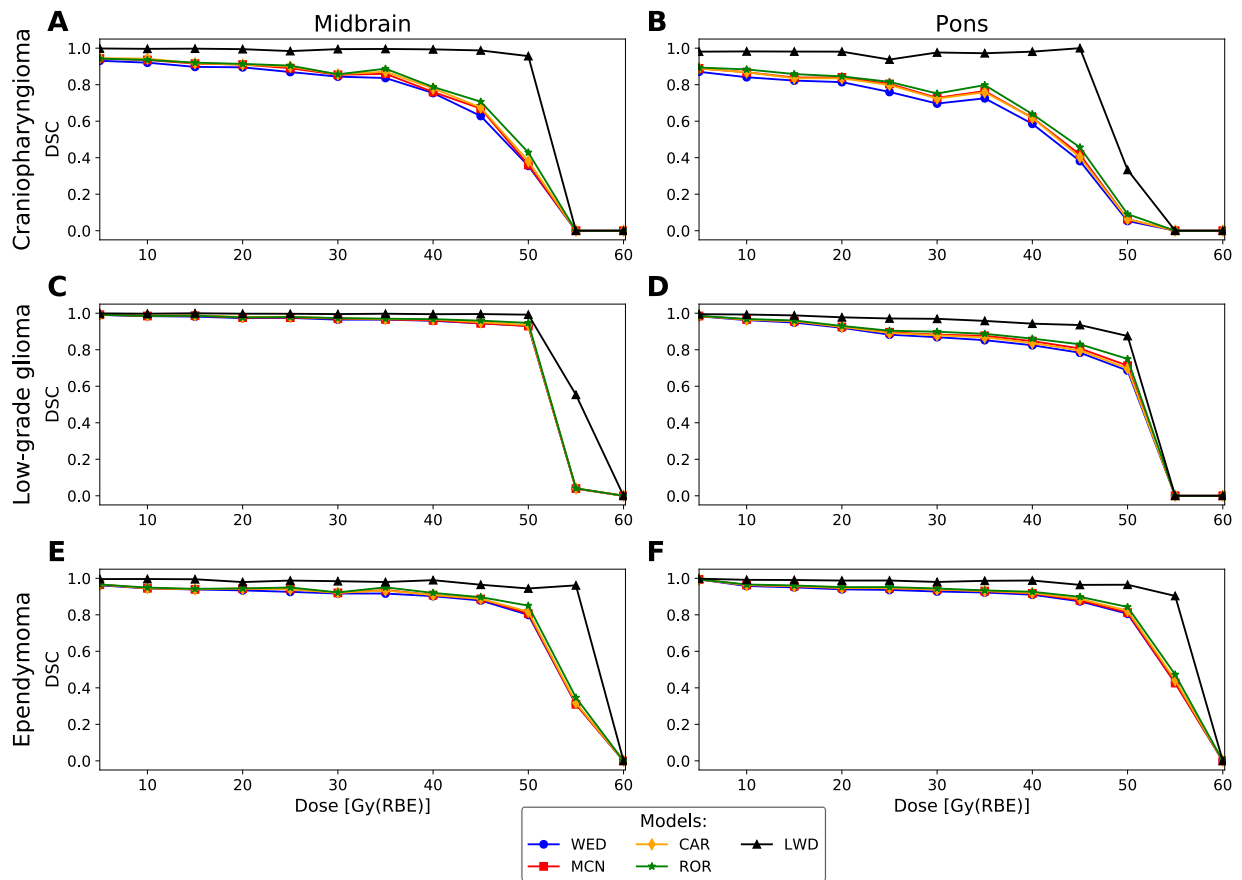

**Figure E4** Dice similarity coefficients for every 5 Gy(RBE) isodose step in the midbrain and pons for the three patients.  $(\alpha/\beta)_x = 2.1$  Gy was used for the phenomenological RBE models. *Abbreviations:* RBE = relative biological effectiveness; DSC = Dice similarity coefficient; WED = Wedenberg; CAR = Carabe; MCN = McNamara; ROR = Rørvik; LWD = LET-weighted dose.

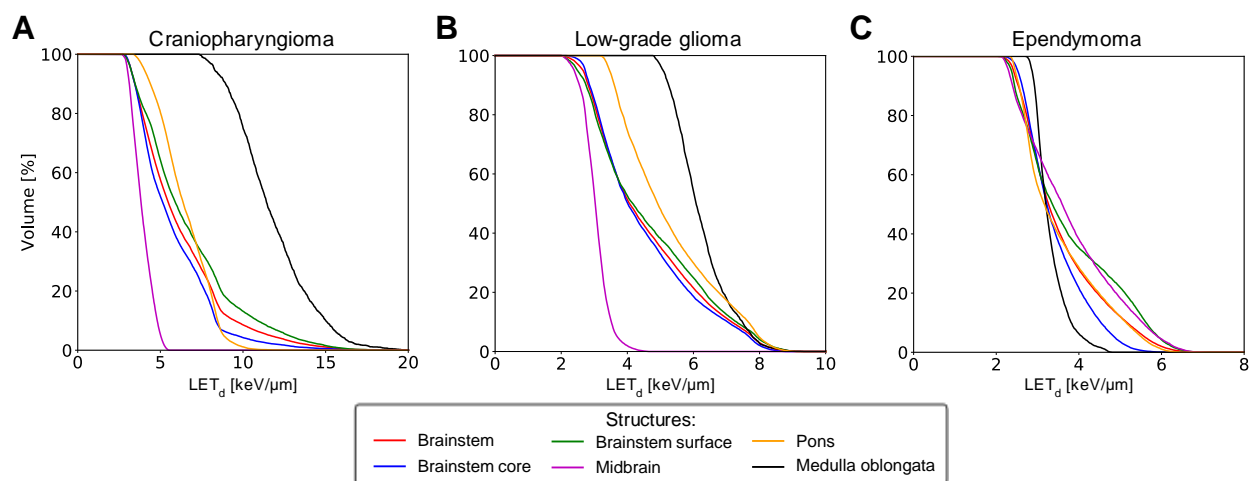

**Figure E5** LET<sub>d</sub> volume histograms for all structures within the three patients. *Abbreviation:* LET<sub>d</sub> = dose-averaged linear energy transfer.

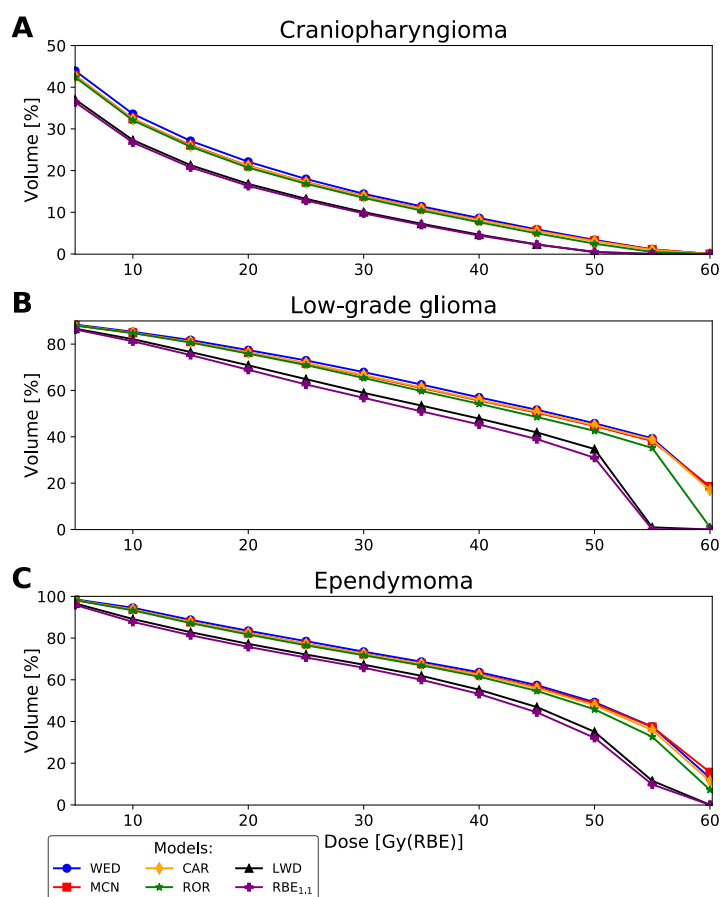

**Figure E6** Volume metrics for every 5 Gy(RBE) isodose step in the brainstem for the three patients.  $(\alpha/\beta)_x = 2.1$  Gy was used for the phenomenological RBE models. *Abbreviations:* RBE = relative biological effectiveness; DSC = Dice similarity coefficient; WED = Wedenberg; CAR = Carabe; MCN = McNamara; ROR = Rørvik; LWD = LET-weighted dose.

**Table E1** Structures with the highest and lowest increase in median biological dose between the WED model and RBE<sub>1.1</sub>, in addition to the increase in median biological dose to the full brainstem

| Patient           | Highest biological dose increase<br>[Gy(RBE)] (structure) | Lowest biological dose increase<br>[Gy(RBE)] (structure) | Biological dose increase in the<br>full brainstem [Gy(RBE)] |
|-------------------|-----------------------------------------------------------|----------------------------------------------------------|-------------------------------------------------------------|
| Craniopharyngioma | 3.5 (midbrain)                                            | 0.0 (medulla oblongata)                                  | 1.5                                                         |
| Ependymoma        | 8.3 (midbrain)                                            | 7.2 (pons)                                               | 7.7                                                         |
| Glioma            | 12.4 (pons)                                               | 0.2 (medulla oblongata)                                  | 10.5                                                        |

*Abbreviations:* RBE = relative biological effectiveness; WED = Wedenberg.
